# Supplementary material for: Seasonal and Zonal Succession of Bacterial Communities in North Sea Salt Marsh Sediments
Source: MDPI journal article supplement (doi:10.3390/microorganisms10050859), 2022-04-21
Supplement: s1 [file s1]

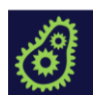

Supplements to:

# Seasonal and Zonal Succession of Bacterial Communities in North Sea Salt Marsh Sediments

Dennis Alexander Tebbe <sup>1</sup>, Simone Geihser <sup>2</sup>, Bernd Wemheuer <sup>2</sup>, Rolf Daniel <sup>2</sup>, Hendrik Schäfer <sup>3</sup> and Bert Engelen <sup>1,\*</sup>

<sup>1</sup> Institute for Chemistry and Biology of the Marine Environment, University of Oldenburg, Carl-von-Ossietzky-Straße 9-11, 26133 Oldenburg; bert.engelen@uol.de

<sup>2</sup> Institute of Microbiology and Genetics, Department of Genomic and Applied Microbiology, Georg-August Georg-August University of Göttingen, Göttingen, Germany; e-mail@e-mail.com

<sup>3</sup> School of Life Sciences, University of Warwick, Gibbet Hill Road, Coventry, CV4 7AL, United Kingdom; h.schaefer@warwick.ac.uk

\* Correspondence: engelen@icbm.de

Table S1: GPS locations and heights in meters above mean sea level (MAMSL)

| Location | Latitude    | Longitude   | MAMSL  |
|----------|-------------|-------------|--------|
| Upp      | 53.76267804 | 7.722335574 | 1.4758 |
| Low      | 53.76224433 | 7.722189404 | 1.4154 |
| Pio1     | 53.76201613 | 7.722134075 | 1.3914 |
| Pio2     | 53.76194715 | 7.722118738 | 1.2791 |
| Pio3     | 53.76187794 | 7.722096806 | 1.2806 |
| Pio4     | 53.76180422 | 7.72206909  | 1.1242 |
| Pio5     | 53.76168163 | 7.721995092 | 0.8105 |
| Edge     | 53.76157062 | 7.721945399 | 0.7241 |
| Mud1     | 53.76144275 | 7.721770671 | 0.8299 |
| Mud2     | 53.76104215 | 7.721726976 | 0.9456 |

Table S2: Permutational manova (PERMANOVA) results.

| F.Model          | R2          | p.value     | p.adjusted | sig   |    |
|------------------|-------------|-------------|------------|-------|----|
| DNA vs RNA       | 4.8409295   | 0.058436446 | 0.001      | 0.001 | ** |
| Upp vs Low       | 3.886039555 | 0.217266631 | 0.002      | 0.02  | .  |
| Upp vs Pio 1-5   | 4.658533799 | 0.091959507 | 0.001      | 0.01  | *  |
| Upp vs Edge      | 5.050657486 | 0.265117227 | 0.001      | 0.01  | *  |
| Upp vs Mud1-2    | 8.188077746 | 0.27123548  | 0.001      | 0.01  | *  |
| Low vs Pio1-5    | 2.846041803 | 0.058265556 | 0.001      | 0.01  | *  |
| Low vs Edge      | 5.422864662 | 0.279200044 | 0.001      | 0.01  | *  |
| Low vs Mud1-2    | 8.780242099 | 0.285255784 | 0.001      | 0.01  | *  |
| Pio1-5 vs Edge   | 4.084929479 | 0.081560053 | 0.001      | 0.01  | *  |
| Pio1-5 vs Mud1-2 | 9.204574874 | 0.145631466 | 0.001      | 0.01  | *  |
| Edge vs Mud1-2   | 1.191016685 | 0.051356812 | 0.267      | 1     |    |
| Sep14 vs Aug15   | 1.965413636 | 0.049177863 | 0.012      | 0.072 |    |
| Sep14 vs March15 | 3.244173196 | 0.078657734 | 0.001      | 0.006 | *  |
| Sep14 vs Oct15   | 1.963793542 | 0.049139318 | 0.011      | 0.066 |    |
| Aug15 vs March15 | 2.909782207 | 0.071126808 | 0.002      | 0.012 | .  |
| Aug15 vs Oct15   | 1.184706767 | 0.030233907 | 0.228      | 1     |    |

Table S3: GPS locations and heights in meters above mean sea level (MAMSL)

| Experiment Accession | Name in study | nucl type | Season  | Library Name              | Experiment Accession |
|----------------------|---------------|-----------|---------|---------------------------|----------------------|
| SRX2847598           | Pio3          | DNA       | Sep14   | M2_Bacteria_DNA_T0_MiSeq  | SRX2847598           |
| SRX2847599           | Pio5          | DNA       | Oct15   | M4_Bacteria_DNA_T3_MiSeq  | SRX2847599           |
| SRX2847600           | Pio5          | RNA       | Oct15   | M4_Bacteria_RNA_T3_MiSeq  | SRX2847600           |
| SRX2847601           | Low           | DNA       | Sep14   | Low_Bacteria_DNA_T0_MiSeq | SRX2847601           |
| SRX2847602           | Pio2          | DNA       | Oct15   | M1_Bacteria_DNA_T3_MiSeq  | SRX2847602           |
| SRX2847603           | Pio4          | DNA       | Oct15   | M3_Bacteria_DNA_T3_MiSeq  | SRX2847603           |
| SRX2847604           | Pio4          | RNA       | Oct15   | M3_Bacteria_RNA_T3_MiSeq  | SRX2847604           |
| SRX2847613           | Mud2          | RNA       | March15 | W2_Bacteria_RNA_T1_MiSeq  | SRX2847613           |
| SRX2847614           | Mud2          | DNA       | March15 | W2_Bacteria_DNA_T1_MiSeq  | SRX2847614           |
| SRX2847615           | Mud1          | RNA       | March15 | W1_Bacteria_RNA_T1_MiSeq  | SRX2847615           |
| SRX2847616           | Mud1          | DNA       | March15 | W1_Bacteria_DNA_T1_MiSeq  | SRX2847616           |
| SRX2847627           | Low           | RNA       | Oct15   | Low_Bacteria_RNA_T3_MiSeq | SRX2847627           |
| SRX2847630           | Pio3          | DNA       | Oct15   | M2_Bacteria_DNA_T3_MiSeq  | SRX2847630           |
| SRX2847639           | Low           | DNA       | Oct15   | Low_Bacteria_DNA_T3_MiSeq | SRX2847639           |
| SRX2847640           | Pio2          | RNA       | Oct15   | M1_Bacteria_RNA_T3_MiSeq  | SRX2847640           |
| SRX2847646           | Pio3          | RNA       | Oct15   | M2_Bacteria_RNA_T3_MiSeq  | SRX2847646           |
| SRX2847648           | Pio2          | DNA       | March15 | M1_Bacteria_DNA_T1_MiSeq  | SRX2847648           |
| SRX2847649           | Pio2          | RNA       | March15 | M1_Bacteria_RNA_T1_MiSeq  | SRX2847649           |
| SRX2847654           | Pio3          | DNA       | March15 | M2_Bacteria_DNA_T1_MiSeq  | SRX2847654           |
| SRX2847655           | Pio3          | RNA       | March15 | M2_Bacteria_RNA_T1_MiSeq  | SRX2847655           |
| SRX2847671           | Pio1          | DNA       | Oct15   | Pio_Bacteria_DNA_T3_MiSeq | SRX2847671           |
| SRX2847672           | Pio1          | RNA       | Oct15   | Pio_Bacteria_RNA_T3_MiSeq | SRX2847672           |
| SRX2847677           | Pio5          | RNA       | March15 | M4_Bacteria_RNA_T1_MiSeq  | SRX2847677           |
| SRX2847678           | Pio5          | DNA       | March15 | M4_Bacteria_DNA_T1_MiSeq  | SRX2847678           |
| SRX2847683           | Pio4          | RNA       | March15 | M3_Bacteria_RNA_T1_MiSeq  | SRX2847683           |
| SRX2847684           | Pio4          | DNA       | March15 | M3_Bacteria_DNA_T1_MiSeq  | SRX2847684           |
| SRX2847688           | Mud2          | RNA       | Sep14   | W2_Bacteria_RNA_T0_MiSeq  | SRX2847688           |
| SRX2847689           | Mud2          | DNA       | Sep14   | W2_Bacteria_DNA_T0_MiSeq  | SRX2847689           |
| SRX2847694           | Mud1          | RNA       | Sep14   | W1_Bacteria_RNA_T0_MiSeq  | SRX2847694           |
| SRX2847695           | Mud1          | DNA       | Sep14   | W1_Bacteria_DNA_T0_MiSeq  | SRX2847695           |
| SRX2847704           | Pio4          | RNA       | Sep14   | M3_Bacteria_RNA_T0_MiSeq  | SRX2847704           |
| SRX2847705           | Pio4          | DNA       | Sep14   | M3_Bacteria_DNA_T0_MiSeq  | SRX2847705           |
| SRX2847706           | Upp           | RNA       | Sep14   | Upp_Bacteria_RNA_T0_MiSeq | SRX2847706           |
| SRX2847707           | Pio5          | RNA       | Sep14   | M4_Bacteria_RNA_T0_MiSeq  | SRX2847707           |
| SRX2847708           | Pio5          | DNA       | Sep14   | M4_Bacteria_DNA_T0_MiSeq  | SRX2847708           |
| SRX2847709           | Upp           | RNA       | Oct15   | Upp_Bacteria_RNA_T3_MiSeq | SRX2847709           |
| SRX2847710           | Upp           | DNA       | Oct15   | Upp_Bacteria_DNA_T3_MiSeq | SRX2847710           |
| SRX2847711           | Low           | DNA       | March15 | Low_Bacteria_DNA_T1_MiSeq | SRX2847711           |
| SRX2847712           | Low           | RNA       | March15 | Low_Bacteria_RNA_T1_MiSeq | SRX2847712           |
| SRX2847717           | Upp           | DNA       | March15 | Upp_Bacteria_DNA_T1_MiSeq | SRX2847717           |
| SRX2847718           | Upp           | RNA       | March15 | Upp_Bacteria_RNA_T1_MiSeq | SRX2847718           |
| SRX2847731           | Edge          | DNA       | Sep14   | M5_Bacteria_DNA_T0_MiSeq  | SRX2847731           |
| SRX2847732           | Edge          | RNA       | Sep14   | M5_Bacteria_RNA_T0_MiSeq  | SRX2847732           |
| SRX2847737           | Low           | RNA       | Sep14   | Low_Bacteria_RNA_T0_MiSeq | SRX2847737           |
| SRX2847739           | Pio3          | RNA       | Sep14   | M2_Bacteria_RNA_T0_MiSeq  | SRX2847739           |
| SRX2847744           | Pio2          | DNA       | Sep14   | M1_Bacteria_DNA_T0_MiSeq  | SRX2847744           |
| SRX2847745           | Pio2          | RNA       | Sep14   | M1_Bacteria_RNA_T0_MiSeq  | SRX2847745           |
| SRX2847754           | Pio1          | RNA       | March15 | Pio_Bacteria_RNA_T1_MiSeq | SRX2847754           |
| SRX2847755           | Pio1          | DNA       | March15 | Pio_Bacteria_DNA_T1_MiSeq | SRX2847755           |
| SRX2847758           | Mud2          | DNA       | Aug15   | W2_Bacteria_DNA_T2_MiSeq  | SRX2847758           |
| SRX2847759           | Mud2          | RNA       | Aug15   | W2_Bacteria_RNA_T2_MiSeq  | SRX2847759           |
| SRX2847764           | Mud1          | DNA       | Aug15   | W1_Bacteria_DNA_T2_MiSeq  | SRX2847764           |
| SRX2847765           | Mud1          | RNA       | Aug15   | W1_Bacteria_RNA_T2_MiSeq  | SRX2847765           |
| SRX2847775           | Pio1          | RNA       | Sep14   | Pio_Bacteria_RNA_T0_MiSeq | SRX2847775           |
| SRX2847776           | Pio1          | DNA       | Sep14   | Pio_Bacteria_DNA_T0_MiSeq | SRX2847776           |
| SRX2847795           | Edge          | RNA       | Aug15   | M5_Bacteria_RNA_T2_MiSeq  | SRX2847795           |
| SRX2847796           | Edge          | DNA       | Aug15   | M5_Bacteria_DNA_T2_MiSeq  | SRX2847796           |
| SRX2847799           | Low           | DNA       | Aug15   | Low_Bacteria_DNA_T2_MiSeq | SRX2847799           |
| SRX2847800           | Low           | RNA       | Aug15   | Low_Bacteria_RNA_T2_MiSeq | SRX2847800           |
| SRX2847809           | Upp           | DNA       | Aug15   | Upp_Bacteria_DNA_T2_MiSeq | SRX2847809           |
| SRX2847810           | Upp           | RNA       | Aug15   | Upp_Bacteria_RNA_T2_MiSeq | SRX2847810           |
| SRX2847835           | Upp           | DNA       | Sep14   | Upp_Bacteria_DNA_T0_MiSeq | SRX2847835           |
| SRX2847844           | Pio1          | RNA       | Aug15   | Pio_Bacteria_RNA_T2_MiSeq | SRX2847844           |
| SRX2847845           | Pio1          | DNA       | Aug15   | Pio_Bacteria_DNA_T2_MiSeq | SRX2847845           |
| SRX2847850           | Mud1          | DNA       | Oct15   | W1_Bacteria_DNA_T3_MiSeq  | SRX2847850           |
| SRX2847851           | Mud1          | RNA       | Oct15   | W1_Bacteria_RNA_T3_MiSeq  | SRX2847851           |
| SRX2847856           | Mud2          | DNA       | Oct15   | W2_Bacteria_DNA_T3_MiSeq  | SRX2847856           |
| SRX2847857           | Mud2          | RNA       | Oct15   | W2_Bacteria_RNA_T3_MiSeq  | SRX2847857           |
| SRX2847863           | Pio4          | DNA       | Aug15   | M3_Bacteria_DNA_T2_MiSeq  | SRX2847863           |
| SRX2847864           | Pio4          | RNA       | Aug15   | M3_Bacteria_RNA_T2_MiSeq  | SRX2847864           |
| SRX2847868           | Pio3          | RNA       | Aug15   | M2_Bacteria_RNA_T2_MiSeq  | SRX2847868           |
| SRX2847869           | Pio3          | DNA       | Aug15   | M2_Bacteria_DNA_T2_MiSeq  | SRX2847869           |
| SRX2847874           | Pio2          | RNA       | Aug15   | M1_Bacteria_RNA_T2_MiSeq  | SRX2847874           |
| SRX2847875           | Pio2          | DNA       | Aug15   | M1_Bacteria_DNA_T2_MiSeq  | SRX2847875           |
| SRX2847878           | Edge          | DNA       | March15 | M5_Bacteria_DNA_T1_MiSeq  | SRX2847878           |
| SRX2847879           | Edge          | RNA       | March15 | M5_Bacteria_RNA_T1_MiSeq  | SRX2847879           |
| SRX2847889           | Pio5          | DNA       | Aug15   | M4_Bacteria_DNA_T2_MiSeq  | SRX2847889           |
| SRX2847890           | Edge          | RNA       | Oct15   | M5_Bacteria_RNA_T3_MiSeq  | SRX2847890           |
| SRX2847891           | Edge          | DNA       | Oct15   | M5_Bacteria_DNA_T3_MiSeq  | SRX2847891           |
| SRX2847895           | Pio5          | RNA       | Aug15   | M4_Bacteria_RNA_T2_MiSeq  | SRX2847895           |

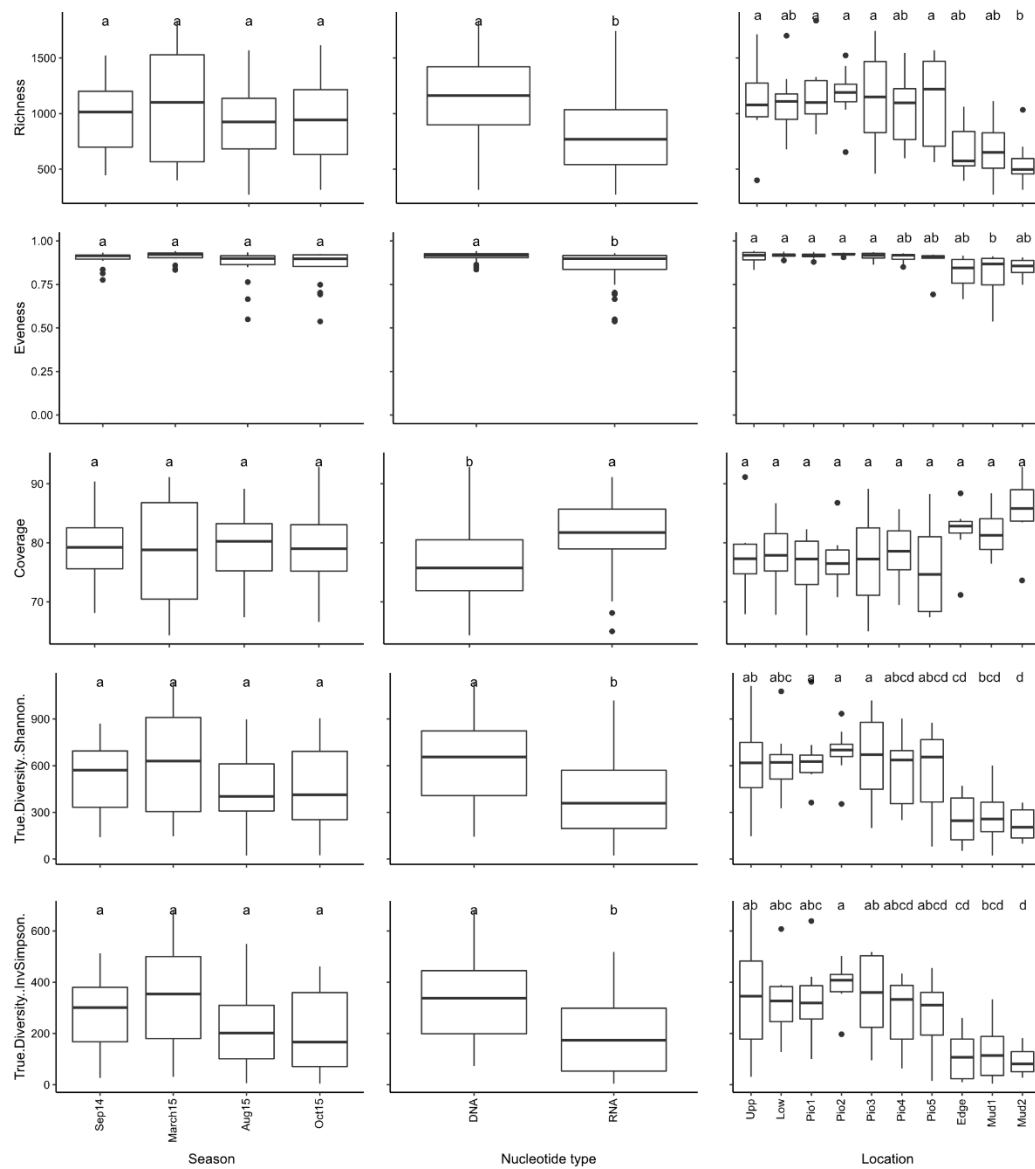

Figure S1: Alpha diversity measures. ASV were rarefied to 5909 and significance of differences in groups were tested with an analysis of variance (ANOVA) with  $p \leq 0.01$ , followed by Tukey's HSD (honestly significant difference) test (alpha 0.05)

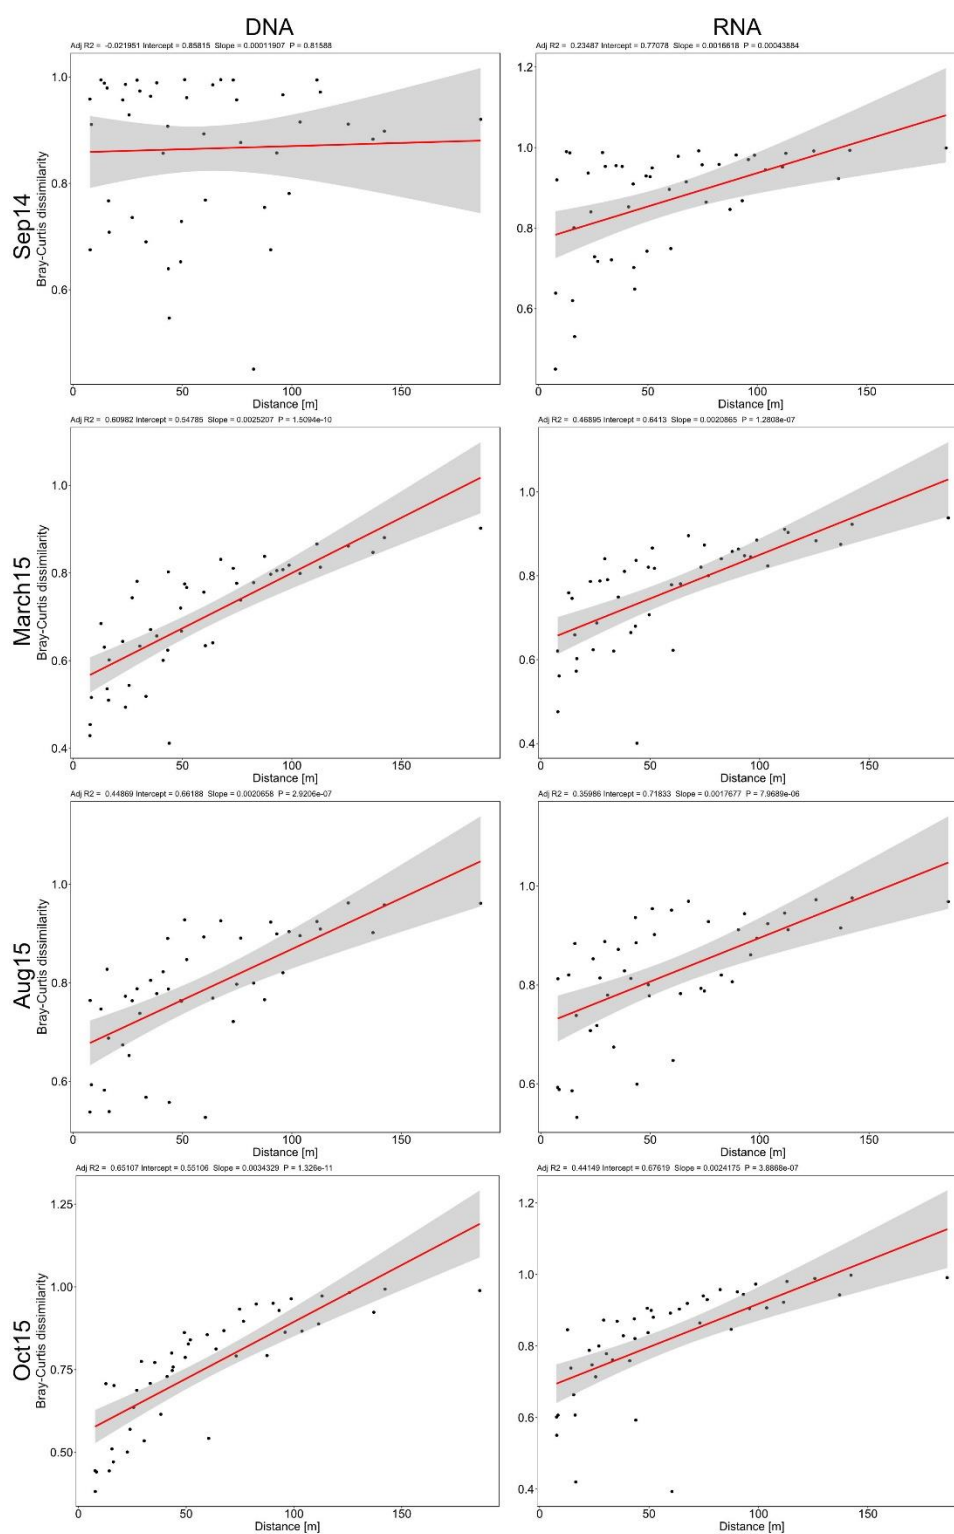

Figure S2: Distance-decay analysis. Pairwise Bray-Curtis dissimilarity over the geographic distance, independent of location. The red line represents a fitting linear model, with 95% confidence level interval as shaded area.

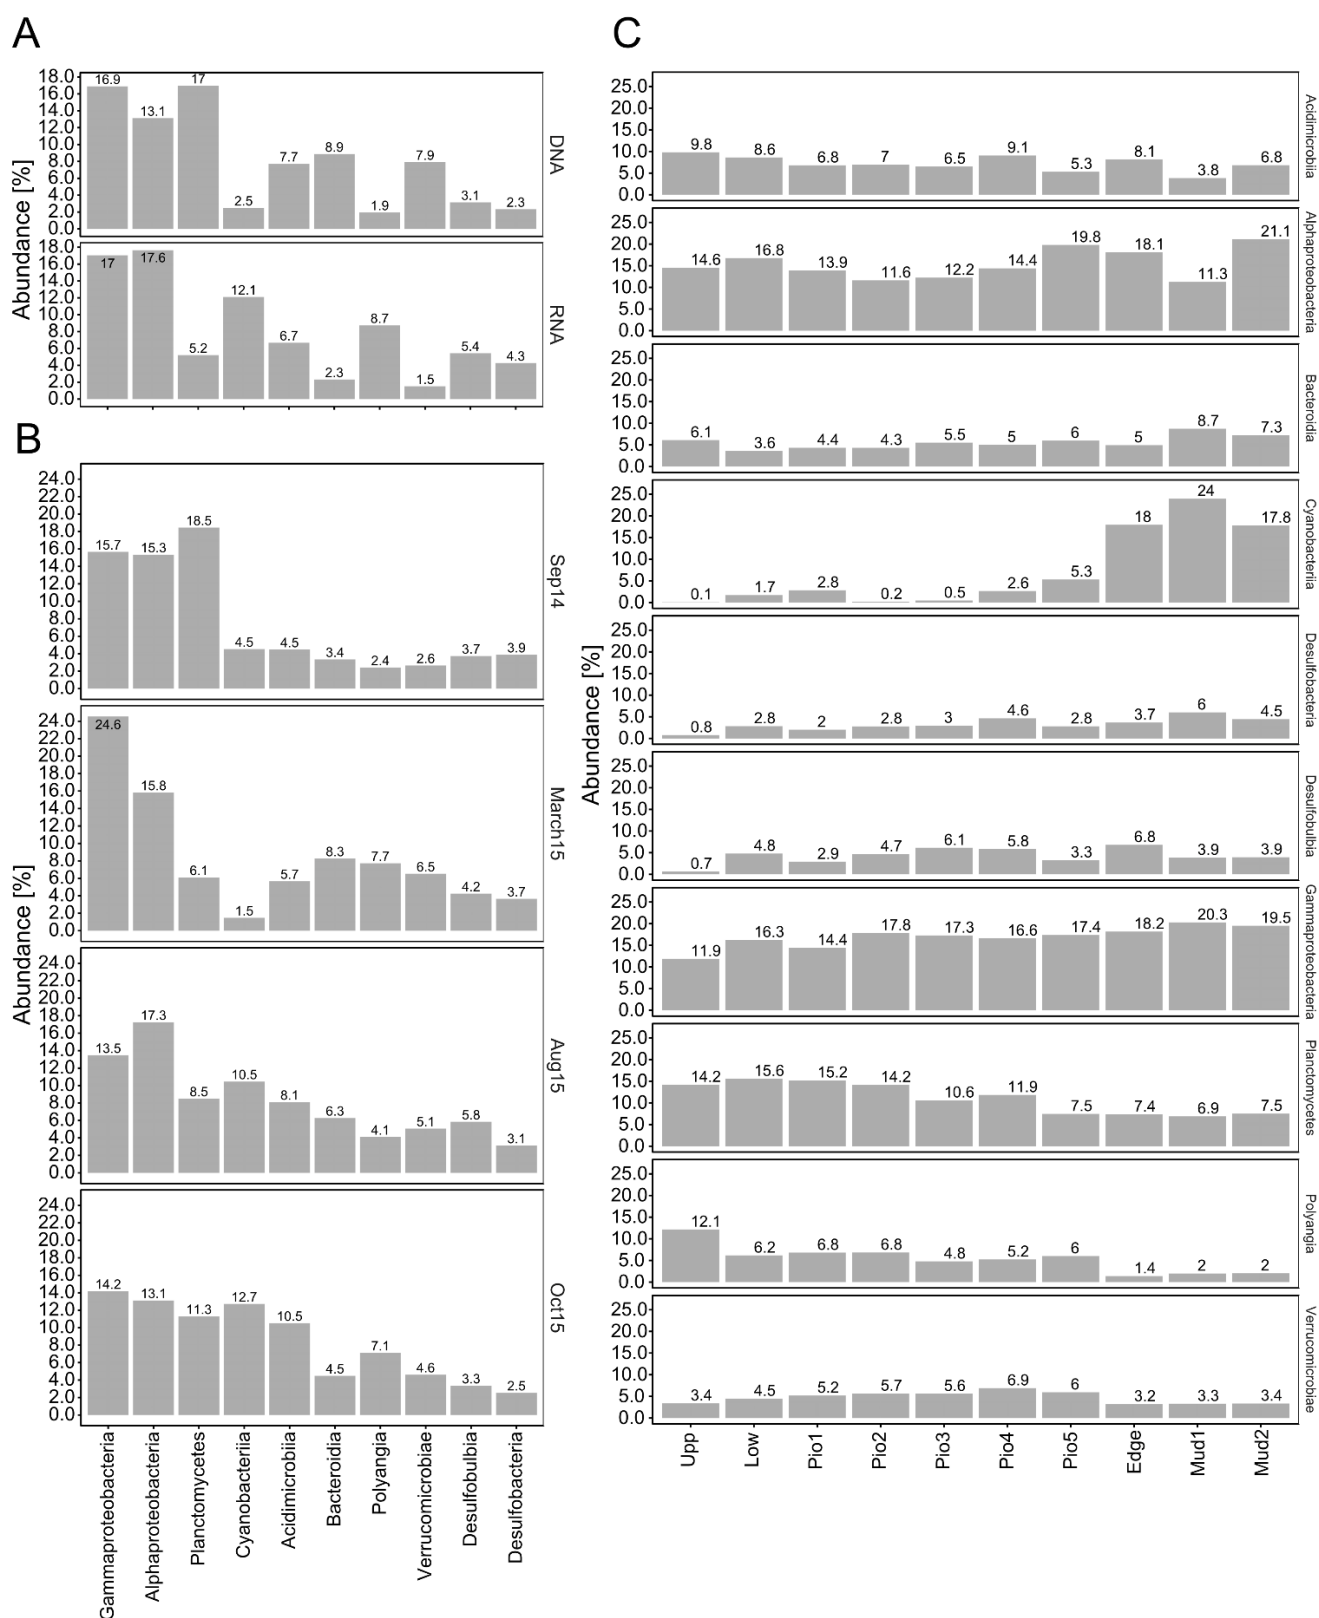

Figure S3: Top 10 most abundant taxa on Class level. (A) Means of all samples for DNA and RNA samples, (B) means of all samples per season, (C) means of all samples per sampling site.

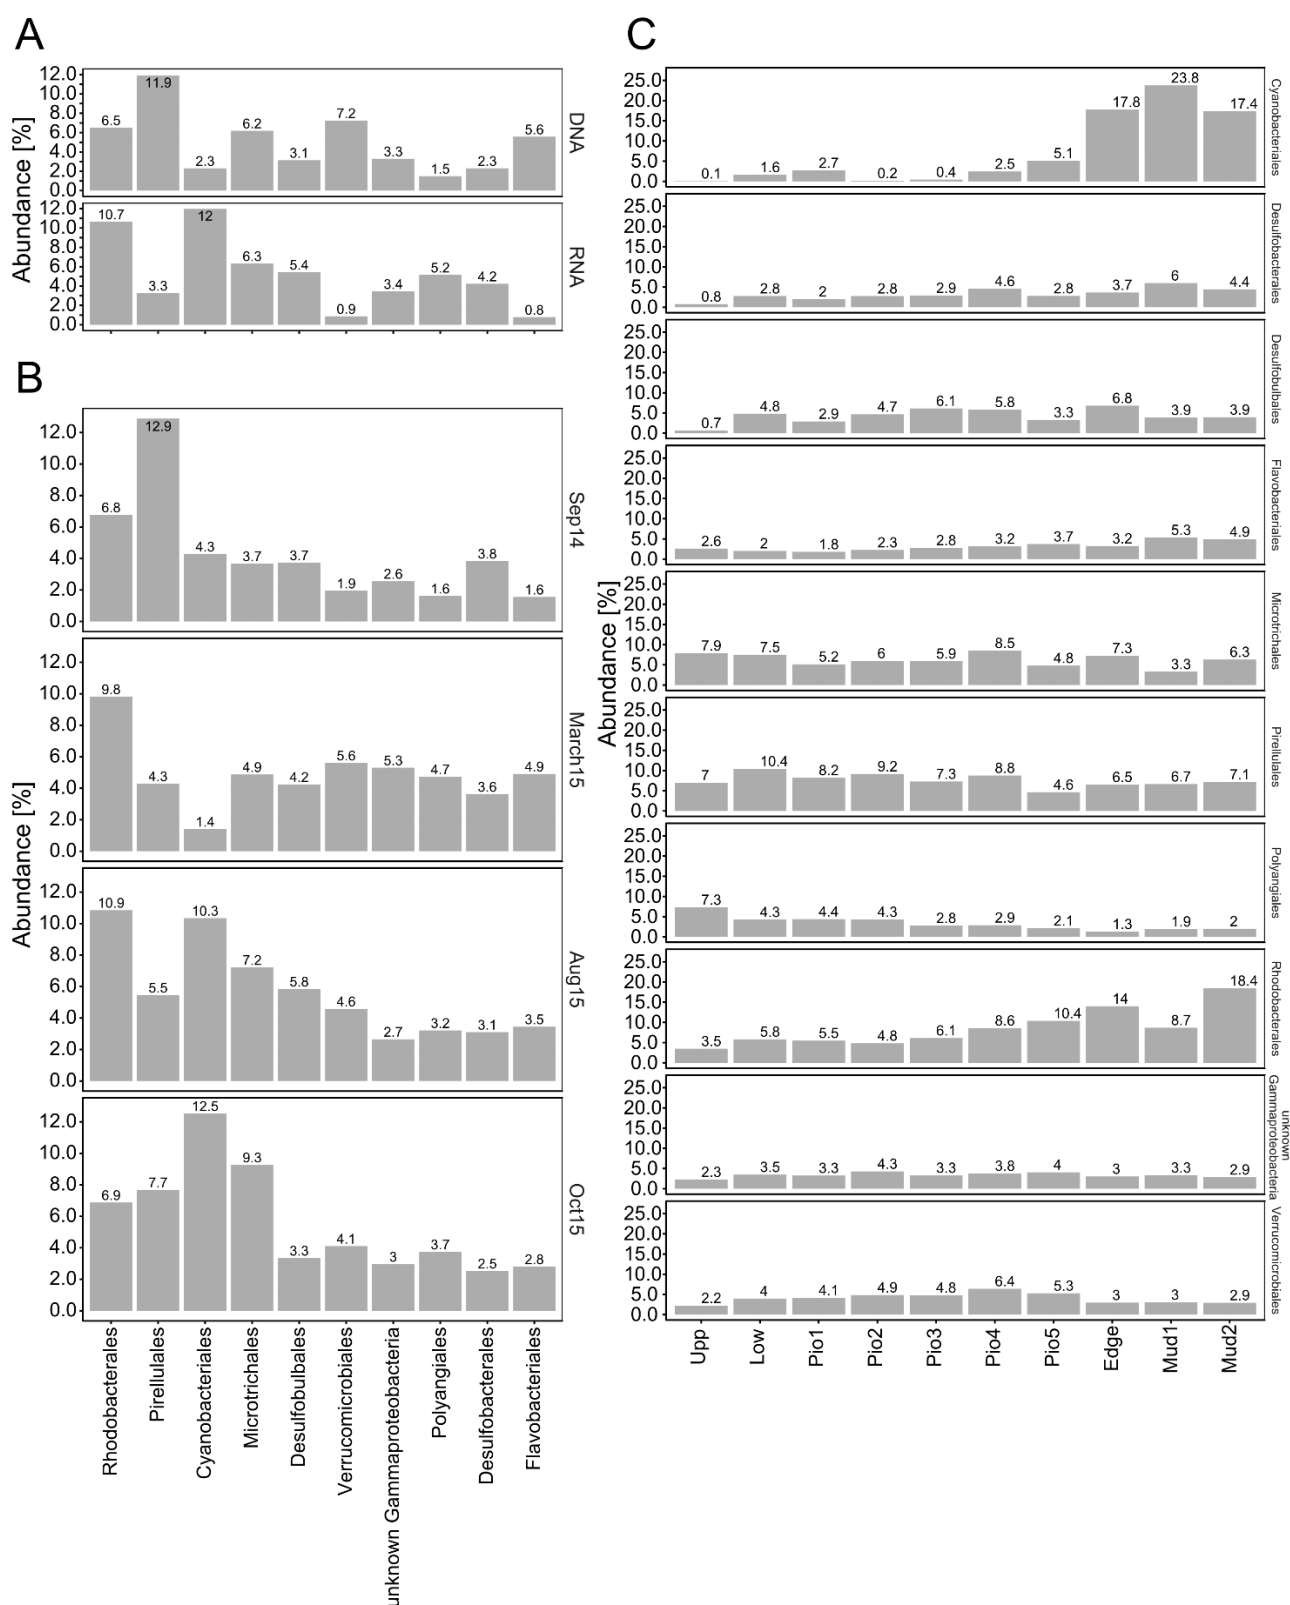

Figure S4: Top 10 most abundant taxa on Order level. (A) Means of all samples for DNA and RNA samples, (B) means of all samples per season, (C) means of all samples per sampling site.
